# Supplementary material for: Perturbation increases source-dependent organic matter degradation rates in estuarine sediments
Source: Copernicus journal article supplement (doi:10.5194/egusphere-2024-3192), 2024-10-24
Supplement: Supplementary file 1 [file egusphere-2024-3192-supplement.pdf]

1 **Supplementary Information**

2

3 **Title:** Perturbation increases source-dependent organic matter degradation rates in estuarine  
4 sediments

5

6 **Author information**

7 Guangnan Wu<sup>1</sup>, Klaas G.J. Nierop<sup>2</sup>, Bingjie Yang<sup>3</sup>, Stefan Schouten<sup>3</sup>, Gert-Jan Reichart<sup>1, 2</sup>, Peter  
8 Kraal<sup>1</sup>

9

10 <sup>1</sup> Royal Netherlands Institute for Sea Research, Department of Ocean Systems, Landsdiep 4, 1797  
11 SZ 't Horntje, The Netherlands

12 <sup>2</sup> Utrecht University, Faculty of Geosciences, Princetonlaan 8a, 3584 CB Utrecht, The Netherlands

13 <sup>3</sup> Royal Netherlands Institute for Sea Research, Department of Marine Microbiology &  
14 Biogeochemistry, Landsdiep 4, 1797 SZ 't Horntje, The Netherlands

15

16 **Corresponding author**

17 Guangnan Wu ([guangnan.wu@nioz.nl](mailto:guangnan.wu@nioz.nl))

18

19

20

21

22

| TABLE OF CONTENTS                                                                                                                                                                                             | Page    |
|---------------------------------------------------------------------------------------------------------------------------------------------------------------------------------------------------------------|---------|
| <b>Table S1</b> Composition of artificial rainwater used in aerobic incubation experiments                                                                                                                    | S3      |
| <b>Table S2</b> MixSIAR modelled marine, riverine, and terrestrial contributions to the OM                                                                                                                    | S4      |
| <b>Table S3</b> Identified MOM pyrolysis products                                                                                                                                                             | S6      |
| <b>Fig. S1</b> The Pearson's correlation matrix of sediment properties                                                                                                                                        | S9      |
| <b>Fig. S2</b> Relative abundance of aromatics, phytadienes, and pristine in MOM pyrolysis products                                                                                                           | S10     |
| <b>Fig. S3</b> The concentration of dissolved O <sub>2</sub> , DIC, and CH <sub>4</sub> in the overlaying water over time during intact sediment core incubation.                                             | S11     |
| <br>Theoretical diffusive fluxes of Fe <sup>2+</sup> , S <sup>2-</sup> and NH <sub>4</sub> <sup>+</sup> and their contributions to the total measured benthic fluxes in the whole-core incubation experiment. | <br>S12 |
| <br><b>Fig. S4</b> Benthic flux of dissolved inorganic nitrogen (DIN), flux ratio of DIC/DIN, DIN-corrected DIC.                                                                                              | <br>S13 |

23  
24  
25  
26  
27  
28  
29  
30  
31

32 **Table. S1.** Composition of artificial rainwater used in aerobic incubation experiments for moisture  
33 adjustment. The composition was based on the Dutch rainwater (Harpenslager et al., 2015).  
34 Chemicals were analytical grade dissolved in milli-Q water.

| Salt                                 | Concentration (mg/L) |
|--------------------------------------|----------------------|
| NaCl                                 | 3.13                 |
| MgSO <sub>4</sub> ·7H <sub>2</sub> O | 1.91                 |
| MgCl <sub>2</sub> ·6H <sub>2</sub> O | 1.22                 |
| CaCl <sub>2</sub> ·H <sub>2</sub> O  | 2.58                 |
| KCl                                  | 1.61                 |

35  
36  
37  
38  
39  
40

41 **Table S2.** MixSIAR modelled marine, riverine, and terrestrial contributions to the OM in 49 PoR  
 42 sediments, respectively. Mean value and standard deviation are provided.  
 43

| Sediment site | Marine contribution | Riverine contribution | Terrestrial contribution |
|---------------|---------------------|-----------------------|--------------------------|
| 201           | 45% ± 19.6%         | 32.7% ± 19.8%         | 22.3% ± 19.1%            |
| 130           | 49.9% ± 19.7%       | 28% ± 18%             | 22% ± 18.9%              |
| 93            | 27.5% ± 16.5%       | 36.3% ± 22%           | 36.2% ± 23.3%            |
| 131           | 58.1% ± 19.4%       | 23.7% ± 16.3%         | 18.2% ± 17.3%            |
| 202           | 41.5% ± 19%         | 21.7% ± 16.1%         | 36.8% ± 22.3%            |
| 117           | 49% ± 20.1%         | 32.4% ± 19.6%         | 18.7% ± 17.8%            |
| 90            | 50.5% ± 20%         | 28.3% ± 18.3%         | 21.3% ± 18.6%            |
| 89            | 58.4% ± 19.7%       | 24.8% ± 16.6%         | 16.9% ± 17.1%            |
| 94            | 55.5% ± 19.7%       | 25.8% ± 16.9%         | 18.7% ± 17.5%            |
| 123v1         | 42.6% ± 19.7%       | 36% ± 20.7%           | 21.4% ± 18.7%            |
| 115           | 57.4% ± 19.7%       | 26.3% ± 17.3%         | 16.3% ± 16.2%            |
| 140           | 63.4% ± 18.9%       | 19.8% ± 14.2%         | 16.8% ± 16.5%            |
| 114           | 62.2% ± 19.2%       | 22% ± 15.5%           | 15.8% ± 16.6%            |
| 204           | 32.6% ± 17.7%       | 34.6% ± 21%           | 32.8% ± 22.5%            |
| 86            | 63.6% ± 18.7%       | 20.3% ± 14.6%         | 16.1% ± 16%              |
| C1            | 62.7% ± 19.2%       | 21.4% ± 15.2%         | 15.9% ± 16.3%            |
| NWWG-09       | 22.9% ± 16.1%       | 48.4% ± 24.6%         | 28.8% ± 22.6%            |
| 73            | 37.3% ± 20.1%       | 42% ± 22.4%           | 20.7% ± 19.1%            |
| 76            | 33.8% ± 18.7%       | 41.1% ± 22.2%         | 25% ± 20.6%              |
| 80C           | 33.8% ± 18.9%       | 42.5% ± 22.7%         | 23.6% ± 20%              |
| 71            | 36.3% ± 19.4%       | 41.5% ± 22.4%         | 22.2% ± 19.8%            |
| 68            | 35% ± 19.3%         | 42.4% ± 22.6%         | 22.5% ± 20%              |
| 66            | 32.8% ± 18.6%       | 43.3% ± 22.9%         | 23.9% ± 20.1%            |
| 510           | 29.1% ± 18.3%       | 47.3% ± 23.7%         | 23.6% ± 20.6%            |
| D1            | 22.5% ± 15.9%       | 48.2% ± 24.6%         | 29.3% ± 22.6%            |
| 56            | 32.5% ± 19%         | 45.6% ± 23.3%         | 22% ± 19.8%              |
| 51            | 34.6% ± 19.1%       | 41.2% ± 22.5%         | 24.2% ± 20.3%            |
| 31            | 31% ± 18.6%         | 46.3% ± 23.7%         | 22.7% ± 19.9%            |
| 50            | 26.4% ± 16.3%       | 37% ± 22.3%           | 36.7% ± 23.4%            |
| 34            | 27.6% ± 17.7%       | 47.4% ± 23.9%         | 25.1% ± 21%              |
| K17           | 16.9% ± 12.9%       | 42.8% ± 24.4%         | 40.3% ± 24.8%            |
| 37            | 17% ± 13.7%         | 48.9% ± 25.4%         | 34.1% ± 24.2%            |
| 36            | 22% ± 15.7%         | 49.2% ± 24.7%         | 28.8% ± 22.7%            |
| 23            | 18.2% ± 15.4%       | 59.4% ± 25.4%         | 22.4% ± 20.9%            |
| 21A           | 24.7% ± 17%         | 51.2% ± 24.2%         | 24.1% ± 20.6%            |
| S1            | 22.5% ± 16.1%       | 48.5% ± 24.5%         | 29% ± 22.6%              |
| 21Lv2         | 18.1% ± 15%         | 56.9% ± 25.4%         | 24.9% ± 21.5%            |
| 17            | 19.4% ± 14.6%       | 47.7% ± 24.8%         | 32.9% ± 23.7%            |
| 16            | 13.2% ± 10.5%       | 30.6% ± 21.5%         | 56.2% ± 24.2%            |
| 33            | 13.5% ± 10.8%       | 33.3% ± 22.5%         | 53.3% ± 24.6%            |

|         |               |               |               |
|---------|---------------|---------------|---------------|
| B16     | 13.8% ± 12.7% | 55.4% ± 26.3% | 30.8% ± 24.2% |
| B22     | 14.6% ± 13.2% | 55.6% ± 25.8% | 29.7% ± 23.6% |
| NWWG-02 | 55.9% ± 19.8% | 27.3% ± 17.8% | 16.8% ± 17.1% |
| NWWG-16 | 27.8% ± 17.2% | 40.3% ± 22.9% | 31.9% ± 22.8% |
| H4      | 21% ± 15.6%   | 48.6% ± 24.8% | 30.5% ± 23.2% |
| 84      | 10.8% ± 9.2%  | 30.3% ± 21.6% | 58.9% ± 23.7% |
| NMS-18  | 23.3% ± 15.3% | 38.2% ± 22.8% | 38.4% ± 24%   |
| 14A     | 17.3% ± 13%   | 43.6% ± 24.5% | 39.1% ± 24.6% |
| K1v2    | 24.8% ± 15.8% | 12.4% ± 11.5% | 62.8% ± 21.1% |

---

44  
45  
46  
47  
48  
49  
50

51 **Table. S3.** Identified pyrolysis products, retention time, and their two fragment ions used to quantify  
 52 and their assignment according to (Nierop et al., 2017). Types: Alk = *n*-alkenes/alkanes, Ar =  
 53 aromatics or alkylbenzenes, Gua = guaiacols, Nt = N-containing compounds, Ph = phenols, Phy =  
 54 phytadienes, Pri = pris-1-ene, Ps = polysaccharide-derived products, Syr = syringols. RT = retention  
 55 time  
 56

| RT    | Pyrolysis product | <i>m/z</i> | Correction factor | Type |
|-------|-------------------|------------|-------------------|------|
| 9.47  | C <sub>11:1</sub> | 55+57      | 4.90              | Alk  |
| 9.70  | C <sub>11:0</sub> | 55+57      | 2.90              | Alk  |
| 11.50 | C <sub>12:1</sub> | 55+57      | 4.90              | Alk  |
| 11.76 | C <sub>12:0</sub> | 55+57      | 2.90              | Alk  |
| 13.50 | C <sub>13:1</sub> | 55+57      | 4.90              | Alk  |
| 13.72 | C <sub>13:0</sub> | 55+57      | 2.90              | Alk  |
| 15.45 | C <sub>14:1</sub> | 55+57      | 4.90              | Alk  |
| 15.57 | C <sub>14:0</sub> | 55+57      | 2.90              | Alk  |
| 17.15 | C <sub>15:1</sub> | 55+57      | 4.90              | Alk  |
| 17.32 | C <sub>15:0</sub> | 55+57      | 2.90              | Alk  |
| 18.82 | C <sub>16:1</sub> | 55+57      | 4.90              | Alk  |
| 18.98 | C <sub>16:0</sub> | 55+57      | 2.90              | Alk  |
| 20.40 | C <sub>17:1</sub> | 55+57      | 4.90              | Alk  |
| 20.55 | C <sub>17:0</sub> | 55+57      | 2.90              | Alk  |
| 21.90 | C <sub>18:1</sub> | 55+57      | 4.90              | Alk  |
| 22.05 | C <sub>18:0</sub> | 55+57      | 2.90              | Alk  |
| 23.30 | C <sub>19:1</sub> | 55+57      | 4.90              | Alk  |
| 23.48 | C <sub>19:0</sub> | 55+57      | 2.90              | Alk  |
| 24.70 | C <sub>20:1</sub> | 55+57      | 4.90              | Alk  |
| 24.82 | C <sub>20:0</sub> | 55+57      | 2.90              | Alk  |
| 26.00 | C <sub>21:1</sub> | 55+57      | 4.90              | Alk  |
| 26.12 | C <sub>21:0</sub> | 55+57      | 2.90              | Alk  |
| 27.26 | C <sub>22:1</sub> | 55+57      | 4.90              | Alk  |
| 27.36 | C <sub>22:0</sub> | 55+57      | 2.90              | Alk  |
| 28.45 | C <sub>23:1</sub> | 55+57      | 4.90              | Alk  |
| 28.55 | C <sub>23:0</sub> | 55+57      | 2.90              | Alk  |
| 29.59 | C <sub>24:1</sub> | 55+57      | 4.90              | Alk  |
| 29.69 | C <sub>24:0</sub> | 55+57      | 2.90              | Alk  |
| 30.69 | C <sub>25:1</sub> | 55+57      | 4.90              | Alk  |
| 30.79 | C <sub>25:0</sub> | 55+57      | 2.90              | Alk  |
| 31.75 | C <sub>26:1</sub> | 55+57      | 4.90              | Alk  |
| 31.85 | C <sub>26:0</sub> | 55+57      | 2.90              | Alk  |
| 32.76 | C <sub>27:1</sub> | 55+57      | 4.90              | Alk  |
| 32.86 | C <sub>27:0</sub> | 55+57      | 2.90              | Alk  |
| 33.74 | C <sub>28:1</sub> | 55+57      | 4.90              | Alk  |
| 33.84 | C <sub>28:0</sub> | 55+57      | 2.90              | Alk  |
| 34.69 | C <sub>29:1</sub> | 55+57      | 4.90              | Alk  |

|       |                              |         |      |     |
|-------|------------------------------|---------|------|-----|
| 34.79 | C <sub>29:0</sub>            | 55+57   | 2.90 | Alk |
| 35.60 | C <sub>30:1</sub>            | 55+57   | 4.90 | Alk |
| 35.71 | C <sub>30:0</sub>            | 55+57   | 2.90 | Alk |
| 36.51 | C <sub>31:1</sub>            | 55+57   | 4.90 | Alk |
| 36.60 | C <sub>31:0</sub>            | 55+57   | 2.90 | Alk |
| 1.84  | Benzene                      | 78      | 1.90 | Ar  |
| 2.97  | Toluene                      | 91+92   | 1.37 | Ar  |
| 4.50  | Ethylbenzene                 | 91+106  | 1.60 | Ar  |
| 4.68  | 1,3- and 1,4-Dimethylbenzene | 91+106  | 1.60 | Ar  |
| 5.01  | Styrene                      | 103+104 | 2.06 | Ar  |
| 5.10  | 1,2-Dimethylbenzene          | 91+106  | 1.60 | Ar  |
| 9.02  | Guaiacol                     | 109+124 | 1.92 | Gua |
| 11.21 | 4-Methylguaiacol             | 123+138 | 2.37 | Gua |
| 12.92 | 4-Ethylguaiacol              | 137+152 | 1.24 | Gua |
| 13.57 | 4-Vinylguaiacol              | 135+150 | 2.37 | Gua |
| 14.39 | Eugenol                      | 149+164 | 4.19 | Gua |
| 15.33 | <i>cis</i> -Isoeugenol       | 149+164 | 4.19 | Gua |
| 16.06 | <i>trans</i> -Isoeugenol     | 149+164 | 4.19 | Gua |
| 16.58 | 4-Acetylguaiacol             | 151+166 | 4.12 | Gua |
| 2.53  | Pyridine                     | 52+79   | 1.97 | Nt  |
| 2.69  | Pyrrole                      | 67      | 1.67 | Nt  |
| 3.98  | 2-Methylpyrrole              | 80+81   | 1.54 | Nt  |
| 4.19  | 3-Methylpyrrole              | 80+81   | 1.54 | Nt  |
| 4.36  | 4-Methylpyridine             | 66+93   | 1.93 | Nt  |
| 9.67  | Benzyl nitrile               | 90+117  | 2.38 | Nt  |
| 11.68 | Methylbenzyl nitril          | 91+131  | 2.24 | Nt  |
| 13.11 | Indole                       | 90+117  | 2.05 | Nt  |
| 14.85 | Methylindole                 | 130+131 | 2.73 | Nt  |
| 20.05 | Diketodipyrrole              | 93+186  | 3.21 | Nt  |
| 21.64 | Diketopiperazine             | 70+154  | 5.20 | Nt  |
| 23.20 | Diketopiperazine             | 70+194  | 5.20 | Nt  |
| 23.22 | Diketopiperazine             | 70+154  | 5.20 | Nt  |
| 7.17  | Phenol                       | 66+94   | 1.72 | Ph  |
| 8.62  | 2-Methylphenol               | 107+108 | 2.93 | Ph  |
| 9.10  | 3/4-Methylphenol             | 107+108 | 2.35 | Ph  |
| 10.95 | 4-Ethylphenol                | 107+122 | 1.76 | Ph  |
| 12.04 | 4-Vinylphenol                | 91+120  | 1.78 | Ph  |
| 12.13 | Catechol                     | 64+110  | 2.42 | Ph  |
| 22.58 | Neophytadiene                | 68+82   | 5.79 | Phy |
| 22.91 | <i>cis</i> -1,3-Phytadiene   | 68+82   | 6.80 | Phy |
| 23.19 | <i>trans</i> -1,3-Phytadiene | 68+82   | 6.80 | Phy |
| 21.02 | Prist-1-ene                  | 56+57   | 3.44 | Pri |
| 3.75  | 2-Furaldehyde                | 95+96   | 1.60 | Ps  |

|       |                                        |         |      |     |
|-------|----------------------------------------|---------|------|-----|
| 6.20  | 5-Methyl-2-furaldehyde                 | 109+110 | 1.80 | Ps  |
| 6.93  | 4-Hydroxy-5,6-dihydro-(2H)-pyran-2-one | 58+114  | 1.60 | Ps  |
| 9.02  | Levogluconone                          | 96+98   | 4.59 | Ps  |
| 17.81 | Levogluconan                           | 60+73   | 2.10 | Ps  |
| 14.14 | Syringol                               | 139+154 | 2.38 | Syr |
| 15.93 | 4-Methylsyringol                       | 153+168 | 2.94 | Syr |
| 17.32 | 4-Ethylsyringol                        | 167+182 | 1.28 | Syr |
| 17.94 | 4-Vinylsyringol                        | 165+180 | 3.03 | Syr |
| 18.57 | 4-Allylsyringol                        | 179+194 | 3.08 | Syr |
| 19.37 | <i>cis</i> -4-Prop-2-enylsyringol      | 179+194 | 3.08 | Syr |
| 20.14 | <i>trans</i> -4-Prop-2-enylsyringol    | 179+194 | 3.08 | Syr |
| 20.57 | 4-Acetylsyringol                       | 181+196 | 3.90 | Syr |

57  
58  
59  
60  
61  
62



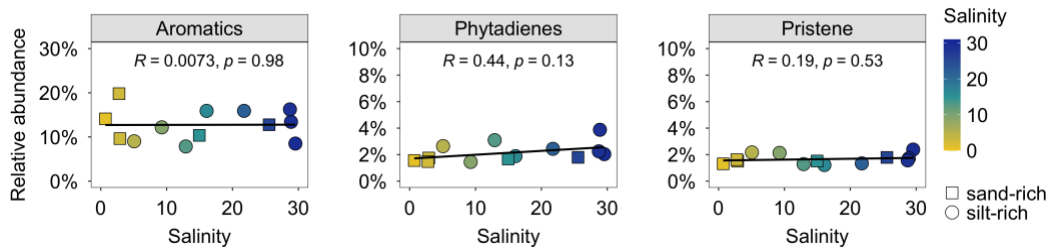

63  
64  
65  
66  
67

**Fig. S1.** Relative abundance of aromatics, phytadienes, and prist-1-ene in MOM pyrolysis products.

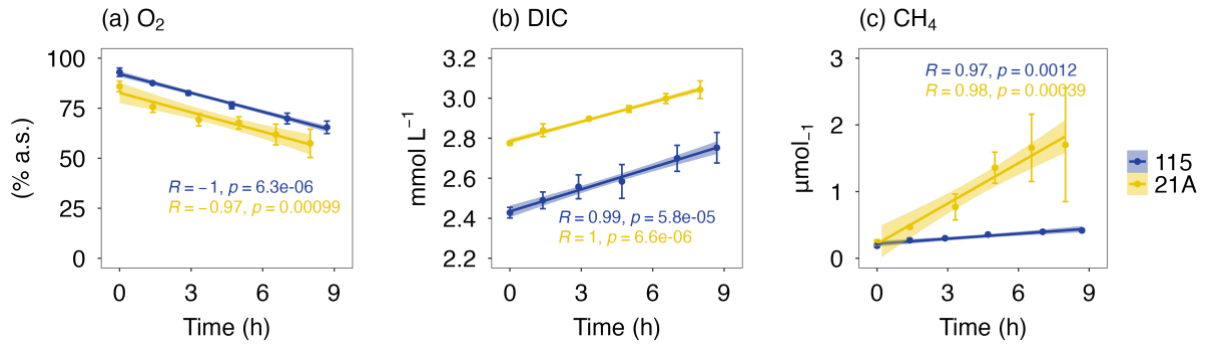

68  
69  
70  
71  
72  
73  
74  
75  
76

**Fig. S2.** The concentration of dissolved O<sub>2</sub>, DIC, and CH<sub>4</sub> in the overlying water over time during intact sediment core incubation.

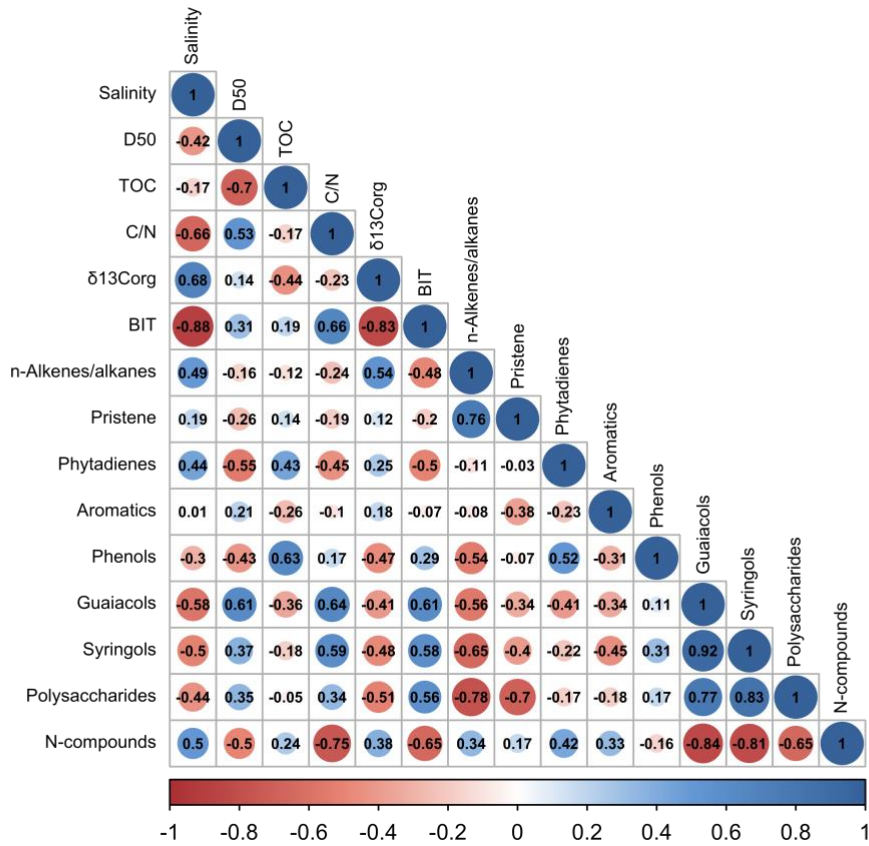

77  
78  
79  
80  
81  
82  
83  
84  
85  
86

**Fig. S3.** The Pearson's correlation matrix of major sediment properties (i.e. salinity, D50, TOC) with sediment OM source proxies (i.e. CN, BIT index, and MOM pyrolysis products).

87 **Theoretical diffusive fluxes of Fe<sup>2+</sup>, S<sup>2-</sup> and NH<sub>4</sub><sup>+</sup> and their contributions to the total measured**  
 88 **benthic fluxes in the whole-core incubation experiment:**

89  
 90 Diffusion fluxes of Fe<sup>2+</sup>, S<sup>2-</sup> and NH<sub>4</sub><sup>+</sup> were calculated from the measured Fe<sup>2+</sup>, S<sup>2-</sup> and NH<sub>4</sub><sup>+</sup>  
 91 concentrations (Table S4) between the bottom water (5 cm above sediment-water interface) and  
 92 porewater in top surface sediment slice (0–0.5 cm, average 0.25 cm below sediment-water interface)  
 93 using Fick's first law:  
 94

$$J = -D \frac{dC}{dz}$$

96  
 97 where  $J$  is the diffusive flux (mol/(m<sup>2</sup> year)),  $D$  is the diffusion coefficient (m<sup>2</sup>/year),  $dC/dz$  is the  
 98 concentration gradient at the sediment-water interface (mol/m<sup>4</sup>). The diffusion coefficients of Fe<sup>2+</sup>, S<sup>2-</sup>  
 99 and NH<sub>4</sub><sup>+</sup> were obtain from the RStudio package 'marelac' (Soetaert et al., 2023), considering the  
 100 salinity (5.1 for 21A and 28.7 for 115) and temperature (22.7 °C for 21A and 18.7 °C for 115), further  
 101 corrected for tortuosity (90% for both 115 and 21A) effect.

102 u

$$D_{corrected} = \frac{D}{1 - 2 \times \log(\text{porosity})}$$

103

104

105 **Table. S4** Major reducing species in the bottom water and porewater for sediment 115 and 21A.

| Species                           | 115          |           | 21A          |           |
|-----------------------------------|--------------|-----------|--------------|-----------|
|                                   | Bottom water | Porewater | Bottom water | Porewater |
| Fe <sup>2+</sup> (μM)             | 0.8          | 195.2     | 7.8          | 101.5     |
| S <sup>2-</sup> (mM)              | 0            | 1.91      | 0            | 1.57      |
| NH <sub>4</sub> <sup>+</sup> (μM) | 421          | 1109      | 186          | 798       |

106

107 The calculated diffusive fluxes of Fe<sup>2+</sup>, S<sup>2-</sup> and NH<sub>4</sub><sup>+</sup> were 0.098 mmol m<sup>-2</sup> d<sup>-1</sup>, 0.0049 mmol m<sup>-2</sup> d<sup>-1</sup>  
 108 and 0.0018 mmol m<sup>-2</sup> d<sup>-1</sup> for sediment 115 and 8.5×10<sup>-5</sup> mmol m<sup>-2</sup> d<sup>-1</sup>, 0.0046 mmol m<sup>-2</sup> d<sup>-1</sup> and  
 109 0.0018 mmol m<sup>-2</sup> d<sup>-1</sup> for sediment 21A. Assuming all diffusive Fe<sup>2+</sup>, S<sup>2-</sup> and NH<sub>4</sub><sup>+</sup> were all oxidized by  
 110 O<sub>2</sub>, the oxidation of Fe<sup>2+</sup>, S<sup>2-</sup> and NH<sub>4</sub><sup>+</sup> consumed 0.038 mmol O<sub>2</sub> m<sup>-2</sup> d<sup>-1</sup> for sediment 115 and 0.013  
 111 mmol O<sub>2</sub> m<sup>-2</sup> d<sup>-1</sup> for 21A, which contributed to less than 0.12% of the total O<sub>2</sub> consumption rates for  
 112 both 21A and 115.

113

114

115

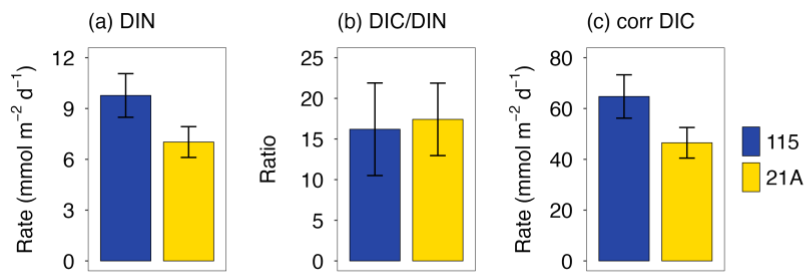

116  
 117 **Fig. S4.** (a) Benthic fluxes of dissolved inorganic nitrogen (DIN); (b) ratio of DIC flux to DIN flux; (c)  
 118 DIN-corrected DIC.

119  
 120 Assuming OM degradation generated DIC and DIN following Redfield ratio (C:N = 106:16), we  
 121 calculate DIN-corrected DIC (Fig. S4c), which accounts for ~40% of the total DIC flux (Fig. 5b). This  
 122 suggests around 40% of DIC was produced from OM degradation, among which 50–71% of DIC was  
 123 generated aerobically when compared to O<sub>2</sub> consumption rates (Fig. 5a).

124  
 125  
 126  
 127  
 128

129 **References**

- 130 Harpenslager, S. F., Van Dijk, G., Kosten, S., Roelofs, J. G. M., Smolders, A. J. P., and Lamers, L. P.  
131 M.: Simultaneous high C fixation and high C emissions in Sphagnum mires, *Biogeosciences*, 12,  
132 4739–4749, <https://doi.org/10.5194/bg-12-4739-2015>, 2015.
- 133 Nierop, K. G. J., Reichart, G. J., Veld, H., and Sinninghe Damsté, J. S.: The influence of oxygen  
134 exposure time on the composition of macromolecular organic matter as revealed by surface  
135 sediments on the Murray Ridge (Arabian Sea), *Geochim Cosmochim Acta*, 206, 40–56,  
136 <https://doi.org/10.1016/j.gca.2017.02.032>, 2017.
- 137 Soetaert, K., Petzoldt, T., Meysman, F., and Meire, L.: marelac: Tools for Aquatic Sciences,  
138 <https://cran.r-project.org/web/packages/marelac/index.html>, 2023.
- 139
- 140
